# Supplementary material for: Increasing HIV-1 Drug Resistance Between 2010 and 2012 in Adults Participating in Population-Based HIV Surveillance in Rural KwaZulu-Natal, South Africa
Source: PubMed Central journal article supplement — AIDS Res Hum Retroviruses. 2016 Aug 1;32(8):763–9. doi: 10.1089/aid.2015.0225 (PMC4971422; doi:10.1089/aid.2015.0225), 2016-08-01
Supplement: Supp_Figure1.pdf [file Supp_Figure1.pdf]

## Supplementary Data

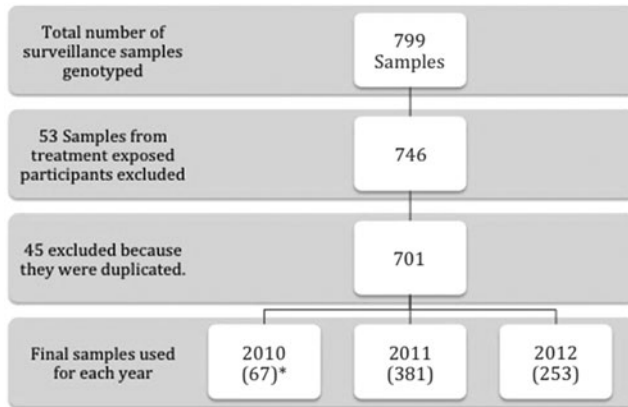

**SUPPLEMENTARY FIG. S1.** Population-based HIV surveillance community viral load samples used for the analysis of primary drug resistance. The final numbers for 2011 and 2012 represent samples from cART-naïve patients with viral load greater than 10,000 RNA copies/ml. \*The WHO minimal sequential sampling strategy was used for 2010. The focus was to genotype recently infected individuals identified through seroconversion in serial testing in an annual population-based HIV surveillance. HIV, human immunodeficiency virus; WHO, World Health Organization.
