# Supplementary material for: Increasing HIV-1 Drug Resistance Between 2010 and 2012 in Adults Participating in Population-Based HIV Surveillance in Rural KwaZulu-Natal, South Africa
Source: PubMed Central journal article supplement — AIDS Res Hum Retroviruses. 2016 Aug 1;32(8):763–9. doi: 10.1089/aid.2015.0225 (PMC4971422; doi:10.1089/aid.2015.0225), 2016-08-01
Supplement: Supp_Figure2.pdf [file Supp_Figure2.pdf]

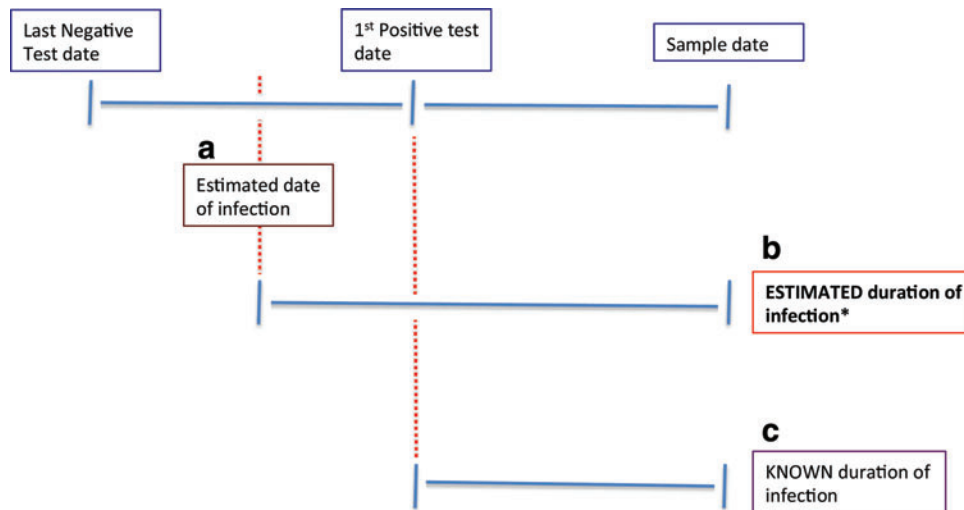

**SUPPLEMENTARY FIG. S2.** Definitions of computed variables. **(a)** Estimated date of infection: the midpoint between the last negative and first positive test in the surveillance. **(b)** Estimated duration of infection: time between the estimated date of infection and the sample date (months). This is the primary variable for the categorization of infections. **(c)** Known duration of infection: time between the first positive date and sample date (months). This is a secondary variable for the categorization of infections.
