# Supplementary material for: Increasing HIV-1 Drug Resistance Between 2010 and 2012 in Adults Participating in Population-Based HIV Surveillance in Rural KwaZulu-Natal, South Africa
Source: PubMed Central journal article supplement — AIDS Res Hum Retroviruses. 2016 Aug 1;32(8):763–9. doi: 10.1089/aid.2015.0225 (PMC4971422; doi:10.1089/aid.2015.0225), 2016-08-01
Supplement: Supp_Table1.pdf [file Supp_Table1.pdf]

SUPPLEMENTARY TABLE S1. SURVEILLANCE SAMPLES WITH SURVEILLANCE DRUG RESISTANCE MUTATIONS AND THE CHARACTERISTICS OF THE PARTICIPANTS THE SAMPLES CAME FROM

| Gender | Sampling year | Sampling date | Age | Viral load (RNA copies/ml) | Last HIV- negative date | Earliest HIV- positive date | Estimated time of infection | Estimated duration of infection | NNRTI mutations                       | NRTI mutations     | Potential pMICT exposure |
|--------|---------------|---------------|-----|----------------------------|-------------------------|-----------------------------|-----------------------------|---------------------------------|---------------------------------------|--------------------|--------------------------|
| Female | 2012          | 2012-04-17    | 26  | 17,480                     | 2011-05-26              | 2012-04-14                  | 2011-11-04                  | 5                               | K103N                                 |                    | No                       |
| Male   | 2011          | 2011-01-27    | 25  | 20,400                     | 2010-01-29              | 2011-01-27                  | 2010-07-30                  | 6                               | Y181C, G190A, H221Y                   | D67N, T215A, K219Q | —                        |
| Female | 2011          | 2011-02-02    | 28  | 101,400                    | 2010-01-29              | 2011-02-02                  | 2010-08-02                  | 6                               | K103N                                 |                    | No                       |
| Female | 2011          | 2011-09-20    | 17  | 114,300                    | 2010-10-21              | 2011-09-20                  | 2011-04-06                  | 6                               | K103N                                 |                    | No                       |
| Female | 2011          | 2011-02-09    | 18  | 24,700                     | 2009-05-18              | 2011-02-09                  | 2010-03-30                  | 10                              | K103N                                 |                    | Yes                      |
| Female | 2012          | 2012-02-20    | 18  | 60,330                     | 2010-10-28              | 2011-09-21                  | 2011-04-10                  | 10                              | K103N                                 |                    | Yes                      |
| Female | 2011          | 2011-08-02    | 21  | 101,200                    | 2008-09-29              | 2011-08-02                  | 2010-03-02                  | 17                              | K103N                                 |                    | No                       |
| Female | 2011          | 2011-05-23    | 21  | 260,100                    | 2008-05-26              | 2011-05-23                  | 2009-11-23                  | 18                              | K103N                                 |                    | Yes                      |
| Female | 2012          | 2012-07-30    | 30  | 169,300                    | 2008-07-14              | 2012-07-26                  | 2010-07-21                  | 24                              | K103N                                 |                    | Yes                      |
| Female | 2012          | 2012-04-04    | 55  | 27,880                     | 2009-08-28              | 2010-05-03                  | 2009-12-30                  | 27                              | K103N                                 |                    | No                       |
| Female | 2012          | 2012-07-30    | 35  | 159,600                    | 2003-09-22              | 2012-07-26                  | 2008-02-23                  | 54                              | K103N                                 |                    | Yes                      |
| Female | 2012          | 2012-04-30    | 27  | 1,617,000                  | 2004-08-24              | 2010-08-31                  | 2007-08-28                  | 56                              | G190A                                 |                    | Yes                      |
| Female | 2012          | 2012-02-28    | 49  | 1,494,000                  | 2004-01-07              | 2010-10-05                  | 2007-05-23                  | 58                              | K103N                                 |                    | No                       |
| Female | 2011          | 2011-09-15    | 26  | 126,900                    | 2005-08-03              | 2006-08-03                  | 2006-02-02                  | 68                              | K103N                                 | M184V              | Yes                      |
| Female | 2011          | 2011-04-19    | 24  | 78,540                     |                         | 2011-04-19                  |                             |                                 | K103N                                 |                    | Yes                      |
| Male   | 2011          | 2011-02-03    | 53  | 143,300                    |                         | 2011-02-03                  |                             |                                 | K103N                                 |                    | —                        |
| Female | 2011          | 2011-02-21    | 17  | 132,400                    |                         | 2011-02-21                  |                             |                                 | K103N                                 |                    | No                       |
| Female | 2011          | 2011-10-06    | 23  | 10,980                     |                         | 2011-10-06                  |                             |                                 | K103N                                 | M41L               | Yes                      |
| Female | 2012          | 2012-10-26    | 17  | 152,000                    |                         | 2012-10-24                  |                             |                                 | V106M                                 |                    | No                       |
| Female | 2012          | 2012-03-30    | 40  | 10,070                     |                         | 2012-03-28                  |                             |                                 | K103N                                 |                    | No                       |
| Male   | 2012          | 2012-03-09    | 17  | 75,340                     |                         | 2012-03-07                  |                             |                                 | K103N                                 | M184V              | —                        |
| Female | 2012          | 2012-06-12    | 17  | 72,800                     |                         | 2012-06-10                  |                             |                                 | K103N                                 | K65R               | No                       |
| Male   | 2012          | 2012-09-20    | 26  | 576,100                    |                         | 2012-09-18                  |                             |                                 | K103N                                 |                    | —                        |
| Female | 2012          | 2012-12-04    | 17  | 397,600                    |                         | 2012-11-30                  |                             |                                 | K103N                                 | K65R               | No                       |
| Female | 2011          | 2011-09-14    | 32  | 46,870                     |                         | 2010-10-12                  |                             |                                 | K103N                                 |                    | No                       |
| Female | 2011          | 2011-10-04    | 39  | 81,420                     |                         | 2009-10-15                  |                             |                                 | K103N                                 |                    | Yes                      |
| Female | 2012          | 2012-01-26    | 25  | 65,210                     |                         | 2009-11-17                  |                             |                                 | K103N, V106M                          | M184V              | Yes                      |
| Female | 2012          | 2012-02-07    | 40  | 664,500                    |                         | 2007-11-18                  |                             |                                 | M41L, D67N, K70R, M184V, T215F, K219Q |                    | No                       |
| Female | 2012          | 2012-06-01    | 34  | 453,700                    |                         | 2007-11-06                  |                             |                                 | K103N                                 |                    | Yes                      |
| Female | 2012          | 2012-06-12    | 39  | 97,600                     |                         | 2006-06-10                  |                             |                                 | K103N                                 |                    | Yes                      |

(continued)

TABLE ST1. (CONTINUED)

| <i>Gender</i> | <i>Sampling year</i> | <i>Sampling date</i> | <i>Age</i> | <i>Viral load (RNA copies/ml)</i> | <i>Last HIV-negative date</i> | <i>Earliest HIV-positive date</i> | <i>Estimated time of infection</i> | <i>Estimated duration of infection</i> | <i>NNRTI mutations</i> | <i>NRTI mutations</i> | <i>Potential pMTCT exposure</i> |
|---------------|----------------------|----------------------|------------|-----------------------------------|-------------------------------|-----------------------------------|------------------------------------|----------------------------------------|------------------------|-----------------------|---------------------------------|
| Male          | 2011                 | 2011-05-17           | 37         | 143,400                           |                               | 2005-03-03                        |                                    |                                        | K101E                  |                       | —                               |
| Male          | 2011                 | 2011-04-04           | 36         | 28,300                            |                               | 2004-10-19                        |                                    |                                        | K103N                  | M184V                 | —                               |
| Female        | 2011                 | 2011-09-13           | 41         | 607,400                           |                               | 2004-08-20                        |                                    |                                        | V106M                  |                       | Yes                             |
| Female        | 2011                 | 2011-03-30           | 40         | 1,025,000                         |                               | 2003-08-21                        |                                    |                                        | K103N                  |                       | Yes                             |
| Female        | 2011                 | 2011-10-07           | 52         | 16,360                            |                               | 2003-12-11                        |                                    |                                        | K103N, P225H           | M184V                 | No                              |
| Female        | 2012                 | 2012-08-06           | 34         | 411,700                           |                               | 2002-12-02                        |                                    |                                        | K103N                  |                       | No                              |

NRTI, nucleoside reverse transcriptase inhibitor; NNRTI, nonnucleoside reverse transcriptase inhibitor; pMTCT, prevention of mother-to-child transmission.
